# Supplementary material for: Linear free energy relationships for the adsorption of volatile organic compounds onto multiwalled carbon nanotubes at different relative humidities: comparison with organoclays and activated carbon
Source: Royal Society of Chemistry journal article supplement (doi:10.1039/c6em00567e), 2017-01-01
Supplement: c6em00567e1.pdf [file c6em00567e1.pdf]

## Supplementary Information

**Table S1.** Molecular descriptors of organic sorbates <sup>37, 40</sup>.

| <b>Class of compounds</b> | <b>Compounds</b>     | <b><i>E</i></b> | <b><i>S</i></b> | <b><i>A</i></b> | <b><i>B</i></b> | <b><i>L</i></b> |
|---------------------------|----------------------|-----------------|-----------------|-----------------|-----------------|-----------------|
| alkane                    | <i>n</i> -pentane    | 0.000           | 0.00            | 0.00            | 0.00            | 2.162           |
|                           | <i>n</i> -hexane     | 0.000           | 0.00            | 0.00            | 0.00            | 2.688           |
|                           | <i>n</i> -heptane    | 0.000           | 0.00            | 0.00            | 0.00            | 3.173           |
|                           | cyclohexane          | 0.305           | 0.10            | 0.00            | 0.00            | 2.964           |
| aromatic                  | benzene              | 0.610           | 0.52            | 0.00            | 0.14            | 2.786           |
| chloroalkane              | dichloromethane      | 0.387           | 0.57            | 0.10            | 0.05            | 2.019           |
|                           | trichloromethane     | 0.425           | 0.49            | 0.15            | 0.02            | 2.480           |
|                           | tetrachloromethane   | 0.458           | 0.38            | 0.00            | 0.00            | 2.823           |
| chloroalkene              | 1,1-dichloroethylene | 0.362           | 0.34            | 0.00            | 0.05            | 2.110           |
|                           | trichloroethylene    | 0.524           | 0.53            | 0.12            | 0.03            | 2.997           |
| alcohol                   | methanol             | 0.278           | 0.44            | 0.43            | 0.47            | 0.970           |
|                           | ethanol              | 0.246           | 0.42            | 0.37            | 0.48            | 1.485           |
|                           | 2-propanol           | 0.212           | 0.36            | 0.33            | 0.56            | 1.764           |
| ether                     | diethyl ether        | 0.041           | 0.25            | 0.00            | 0.45            | 2.015           |
| ketone                    | acetone              | 0.179           | 0.70            | 0.04            | 0.49            | 1.696           |
| ester                     | ethyl acetate        | 0.106           | 0.62            | 0.00            | 0.45            | 2.314           |
| nitrile                   | acetonitrile         | 0.237           | 0.90            | 0.07            | 0.32            | 1.739           |

(a)

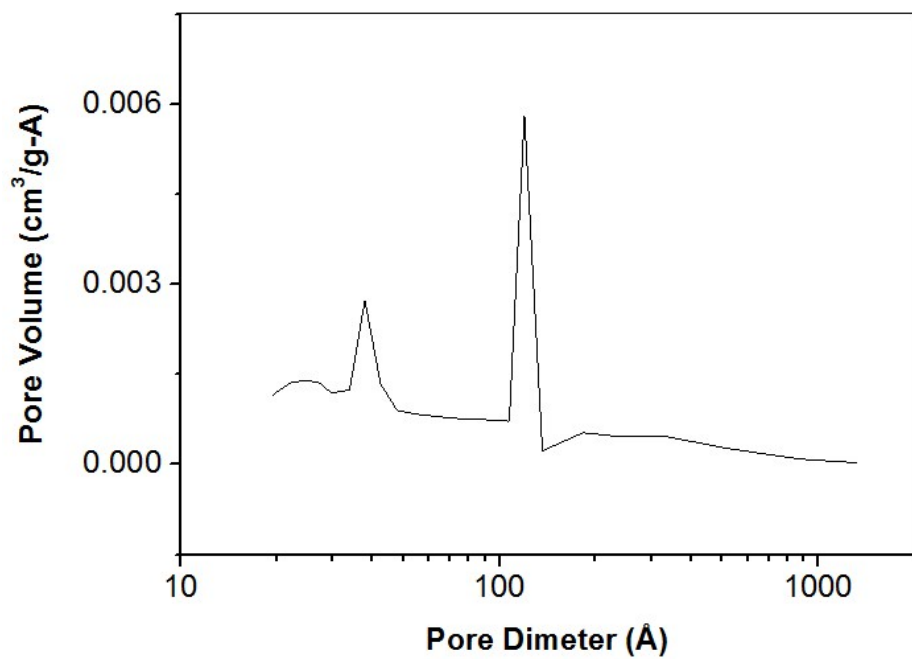

(b)

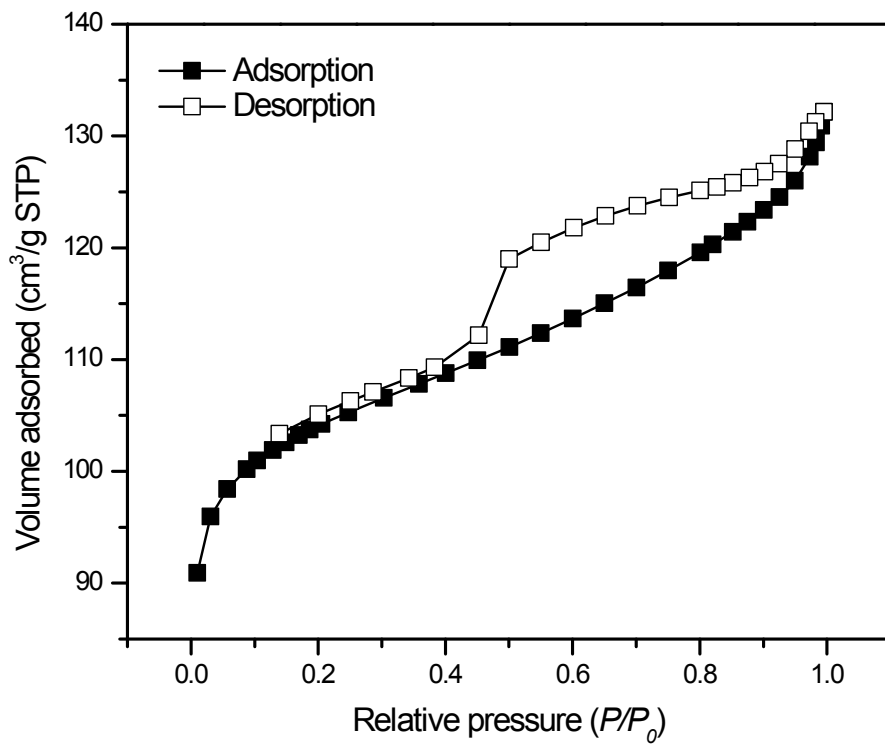

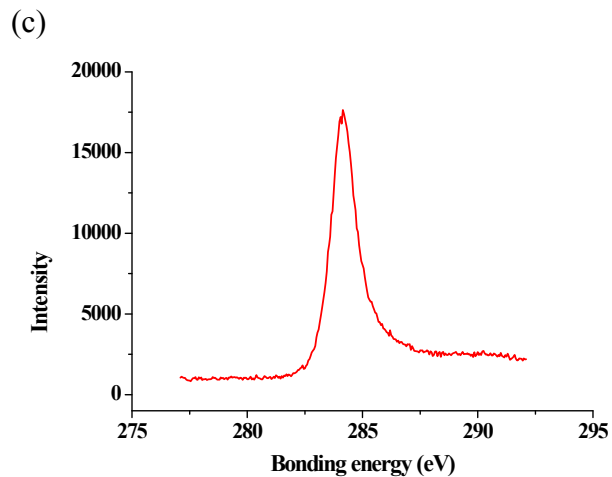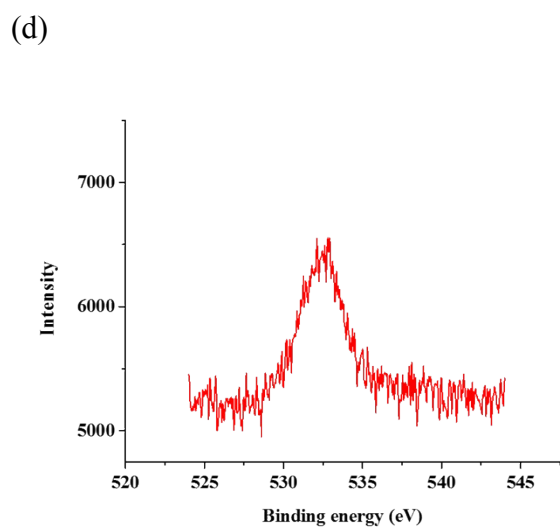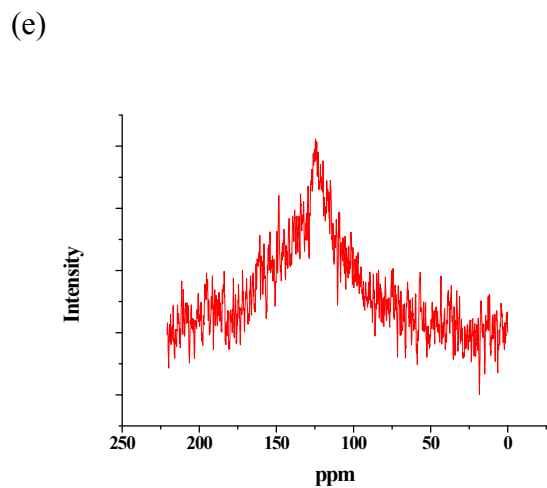

**Figure S1.** (a) Pore size distribution of MWCNT. (b) Adsorption and desorption isotherms of nitrogen on MWCNT. (c) XPS C<sub>1s</sub> spectrum (284–285 eV). (d) XPS O<sub>1s</sub> spectrum (530–535 eV). (e) <sup>13</sup>C NMR spectrum.

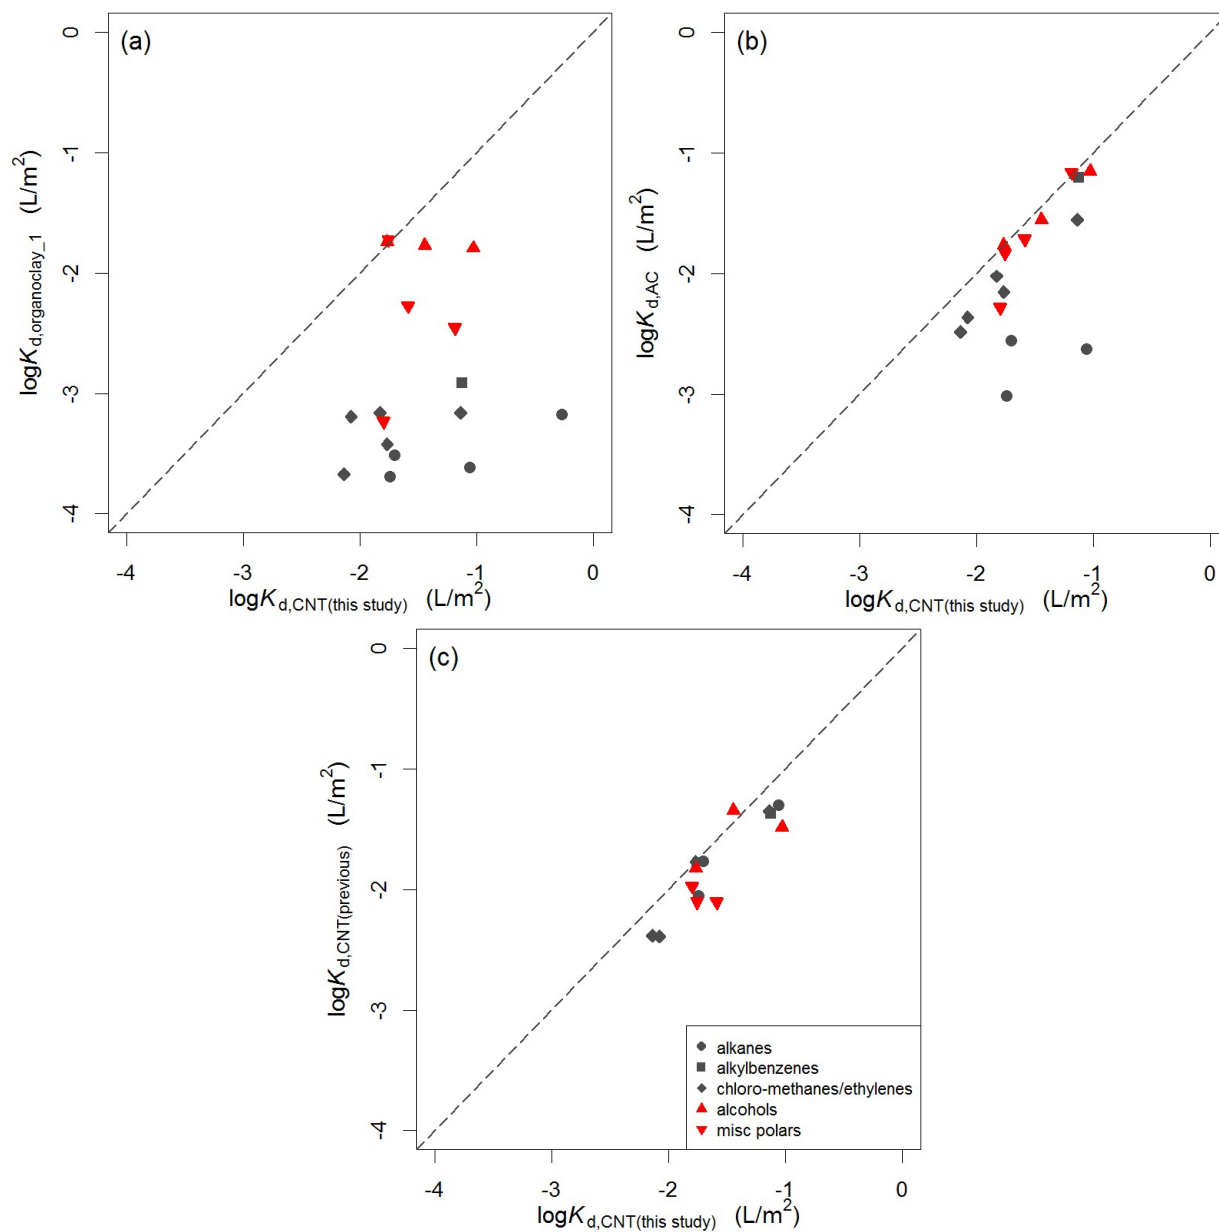

**Figure S2.** Surface area normalized logarithmic gas-solid partition coefficients ( $\log K_d$ ) of VOCs on the MWCNT (designated as ‘*this study*’) compared with (a) organo-clay #1, (b) activated carbon, and (c) at another MWCNT (designated as ‘*previous*’) at 90% RH. The long dashed-line is a 1-to-1 correspondence.

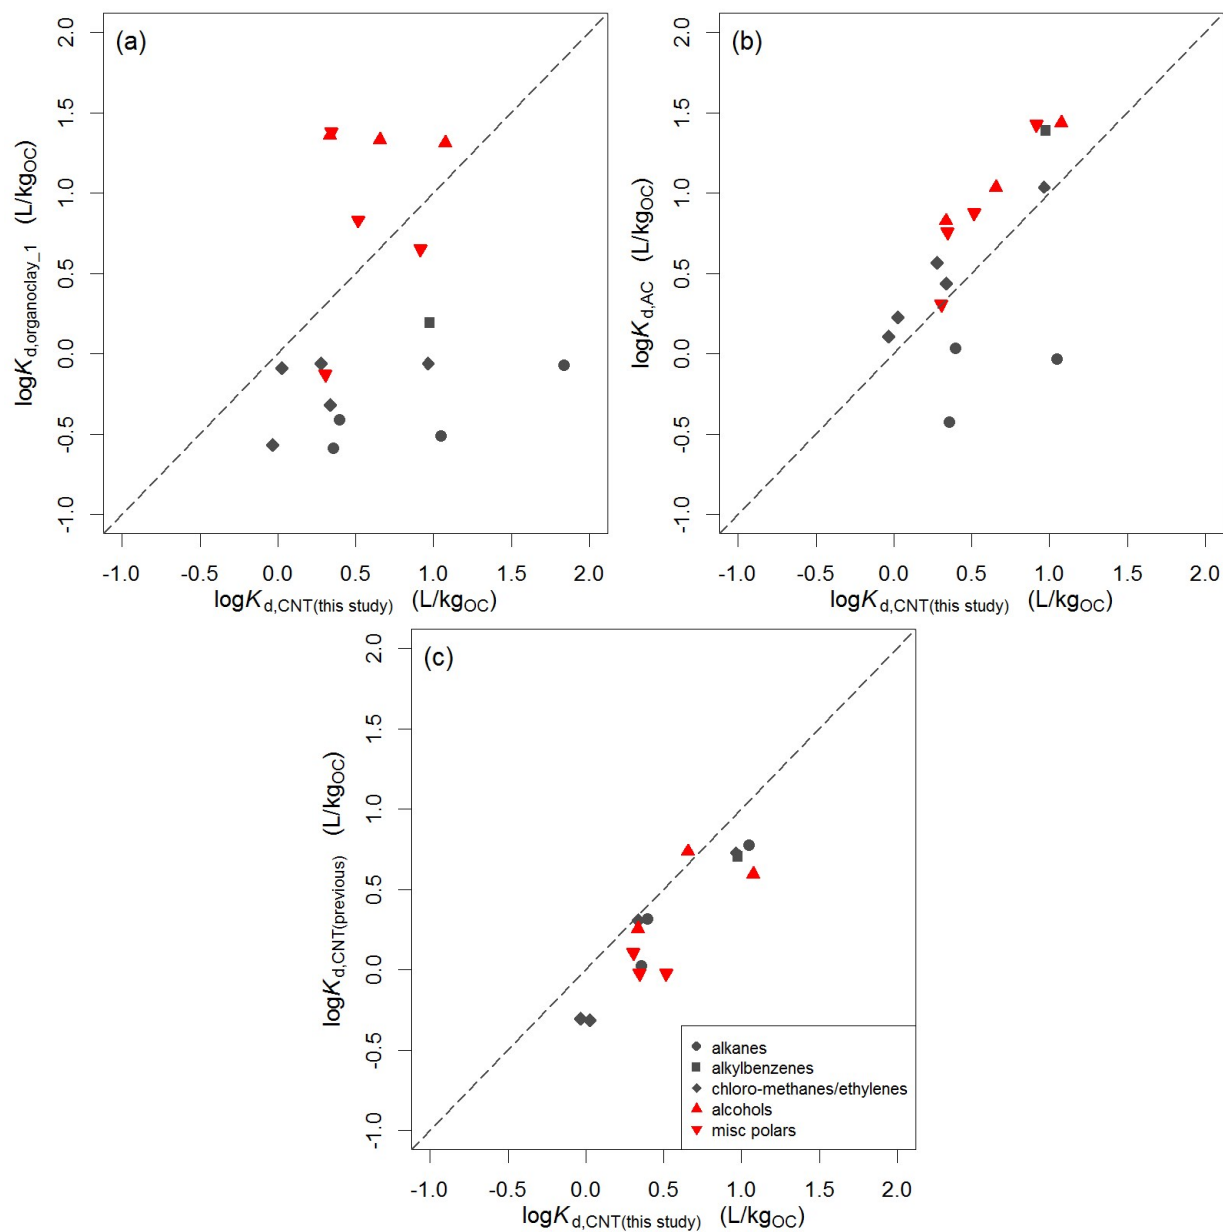

**Figure S3.** Organic carbon normalized logarithmic gas-solid partition coefficients ( $\log K_d$ ) of VOCs on the MWCNT (designated as ‘*this study*’) compared with (a) organo-clay #1, (b) activated carbon, and (c) at another MWCNT (designated as ‘*previous*’) at 90% RH. The long dashed-line is a 1-to-1 correspondence.

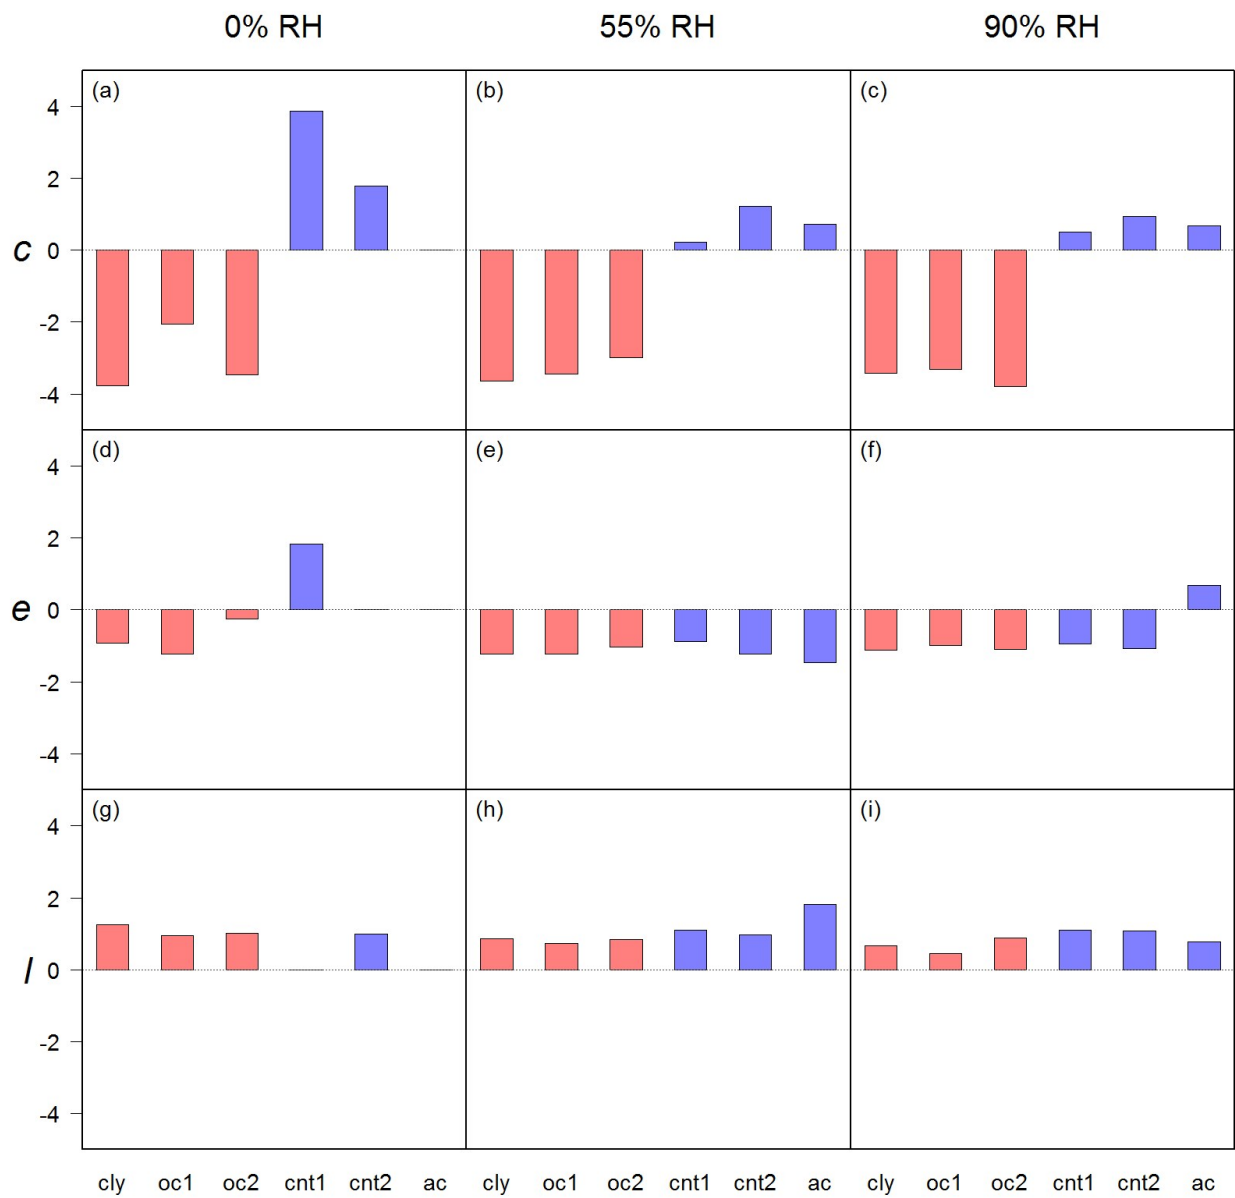

**Figure S4.** Magnitude of system parameters  $c$ ,  $e$ , and  $l$  in the LFER's of gas-solid partitioning of VOCs on six sorbents: montmorillonite clay ('*cly*'), organo-clay #1 and #2 ('*oc1*' & '*oc2*'), MWCNT #1 (previous study) and #2 (this study) ('*cnt1*' & '*cnt2*'), and activated carbon ('*ac*') at the three relative humidities of 0% RH ((a), (d), and (g)), 55% RH ((b), (e), and (h)), and 90% RH ((c), (f), and (i)). Clay-dominant sorbents are marked in red and condensed carbonaceous sorbents are marked in blue.

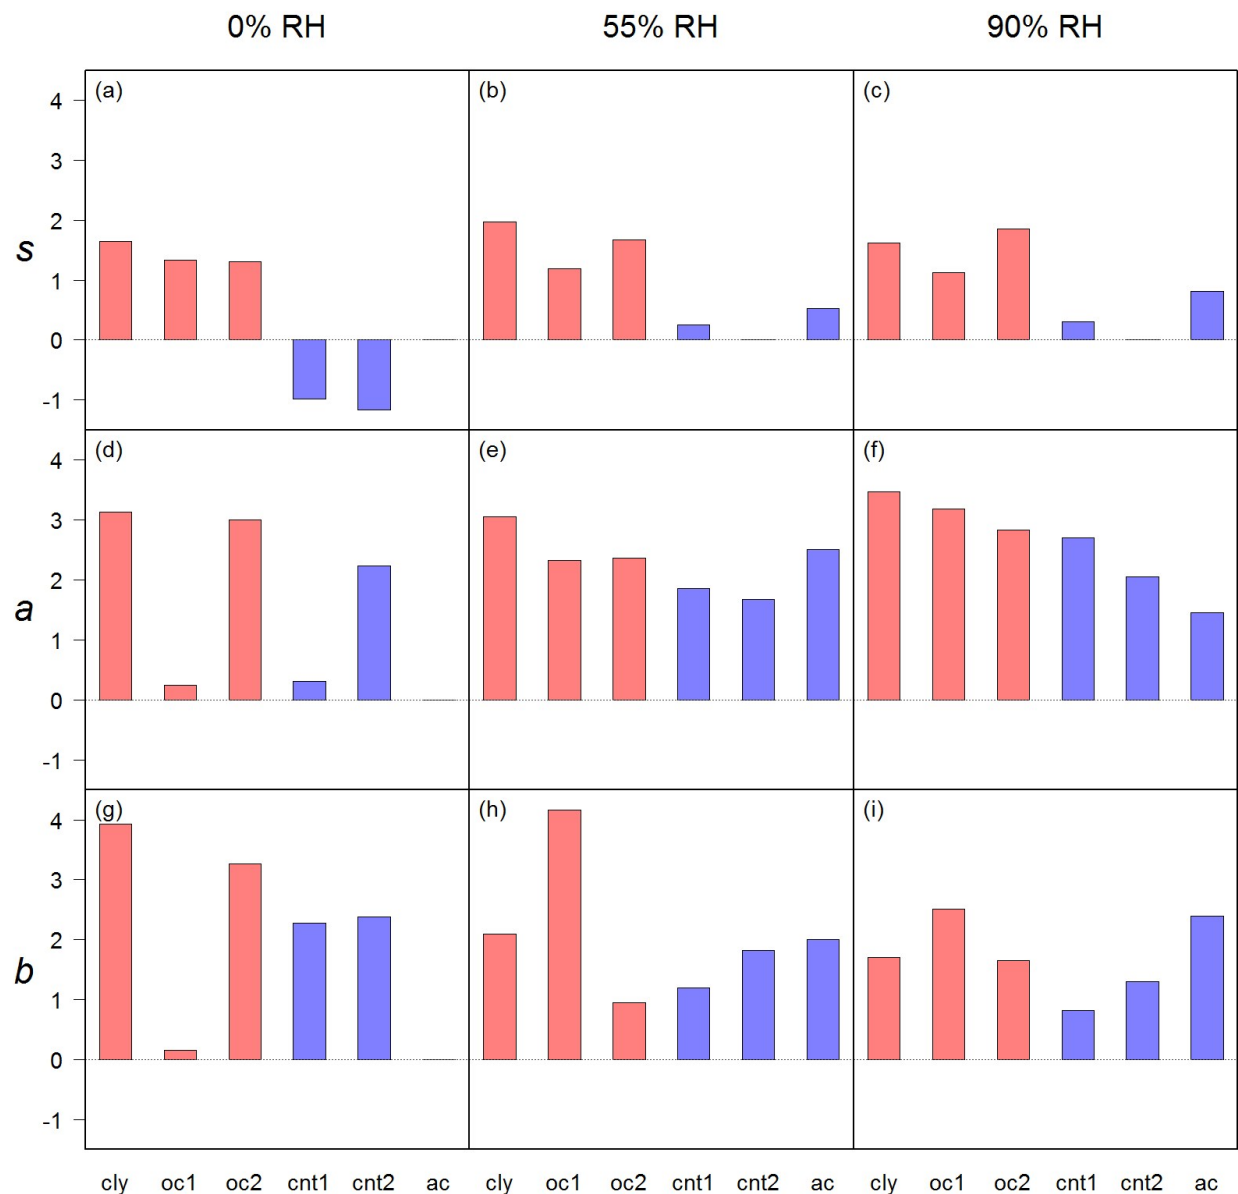

**Figure S5.** Magnitude of system parameters  $s$ ,  $a$ , and  $b$  in the LFER's of gas-solid partitioning of VOCs on six sorbents: montmorillonite clay ('*cly*'), organo-clay #1 and #2 ('*oc1*' & '*oc2*'), MWCNT #1 (previous study) and #2 (this study) ('*cnt1*' & '*cnt2*'), and activated carbon ('*ac*') at the three relative humidities of 0% RH ((a), (d), and (g)), 55% RH ((b), (e), and (h)), and 90% RH ((c), (f), and (i)). Clay-dominant sorbents are marked in red and condensed carbonaceous sorbents are marked in blue.
